# Supplementary material for: The protective effect of different dialysis types on residual renal function in patients with maintenance hemodialysis: A systematic review and meta-analysis
Source: PubMed Central journal article supplement — Medicine (Baltimore). 2018 Sep 14;97(37):e12325. doi: 10.1097/MD.0000000000012325 (PMC6156018; doi:10.1097/md.0000000000012325), 2018-09-14
Supplement: medi-97-e12325-s001.pdf [file medi-97-e12325-s001.pdf]

---

## **Appendix 1. Detailed search strategy**

### 1) Pubmed

#1 residual renal function (All Fields)

#2 hemodialysis OR haemodialysis (Title/Abstract)

#3 High-flux OR High flux OR low-flux OR hemodiafiltration OR hemoperfusion  
OR membrane (Title/Abstract)

#4, #1AND#2AND#3

A total of 139 articles were found.

### 2) EMBase

#1 residual renal function (All Fields)

#2 hemodialysis OR haemodialysis (Abstract)

#3 High-flux OR High flux OR low-flux OR hemodiafiltration OR hemoperfusion  
OR membrane (Abstract)

#4, #1AND#2AND#3

A total of 123 articles were found.

### 3) Web of science

#1 residual renal function (Title)

#2 hemodialysis OR haemodialysis (Title)

#3, #1 AND #2

A total of 323 articles were found.

### 4) Wanfang database

#1 hemodialysis (Abstract)

#2 High flux (Abstract)

#3 residual renal function (Abstract)

#4, #1 AND #2 AND #3

A total of 159 articles were found.

### 5) China National Knowledge Infrastructure (CNKI)

#1 hemodialysis (Abstract)

#2 residual renal function (Abstract)

#3, #1 AND #2

A total of 291 articles were found.

### 6) Chinese Biomedical Literature Database

#1 hemodialysis (Abstract)

#2 residual renal function (All Fields)

#3, #1 AND #2

A total of 326 articles were found.
